# Supplementary material for: Polarization-sensitive photodetection in a two-dimensional interlayer-multiple-cation hybrid perovskite bulk single crystal
Source: Royal Society of Chemistry journal article supplement (doi:10.1039/d1tc05699a), 2022-01-01
Supplement: d1tc05699a1.pdf [file d1tc05699a1.pdf]

## Supporting Information

### **Polarization-Sensitive Photodetection in A Two-Dimensional Interlayer-Multiple-Cation Hybrid Perovskite Bulk Single Crystal**

Qin Chen,<sup>[a, b]</sup> Ziyang Wang,<sup>[b]</sup> Yipeng Fan,<sup>[a, b]</sup> Zhou Li,<sup>[a, b]</sup> Shuhua Zhang,<sup>\*[a]</sup> Chengmin Ji,<sup>\*[b, c]</sup>  
Junhua Luo<sup>\*[b, c]</sup>

[a] College of Chemistry and Bioengineering (Guangxi Key Laboratory of Electrochemical and Magnetochemical Functional Materials), Guilin University of Technology, Guilin, Guangxi, 541004, P. R. China. E-mail: [zsh720108@163.com](mailto:zsh720108@163.com)

[b] State Key Laboratory of Structural Chemistry, Fujian Institute of Research on the Structure of Matter, Chinese Academy of Sciences, Fuzhou, Fujian 350002, China. E-mail: [cmji@fjirsm.ac.cn](mailto:cmji@fjirsm.ac.cn), [jhluo@fjirsm.ac.cn](mailto:jhluo@fjirsm.ac.cn);

[c] University of Chinese Academy of Sciences, Beijing, 100049, China

\*To whom correspondence should be addressed.

[zsh720108@163.com](mailto:zsh720108@163.com)

[cmji@fjirsm.ac.cn](mailto:cmji@fjirsm.ac.cn)

[jhluo@fjirsm.ac.cn](mailto:jhluo@fjirsm.ac.cn)

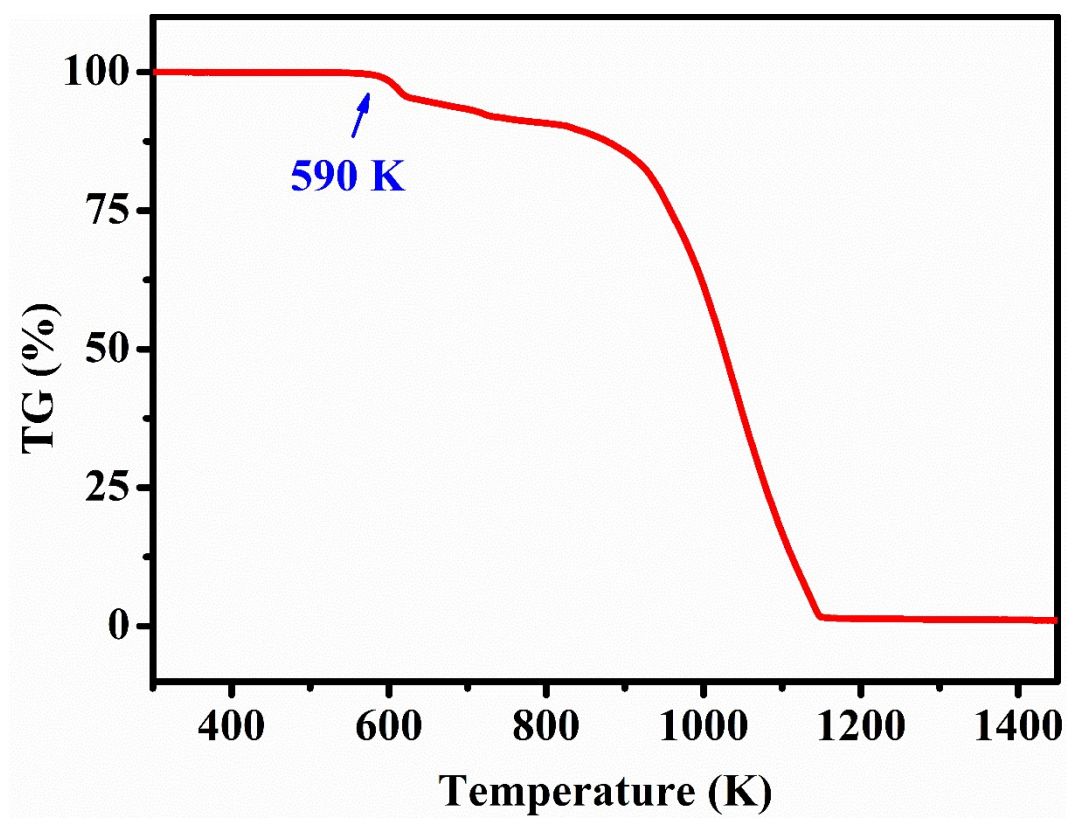

**Figure S1.** Thermogravimetric analysis of synthesized  $\text{Cs}_2[\text{C}(\text{NH}_2)_3]\text{Pb}_2\text{Br}_7$

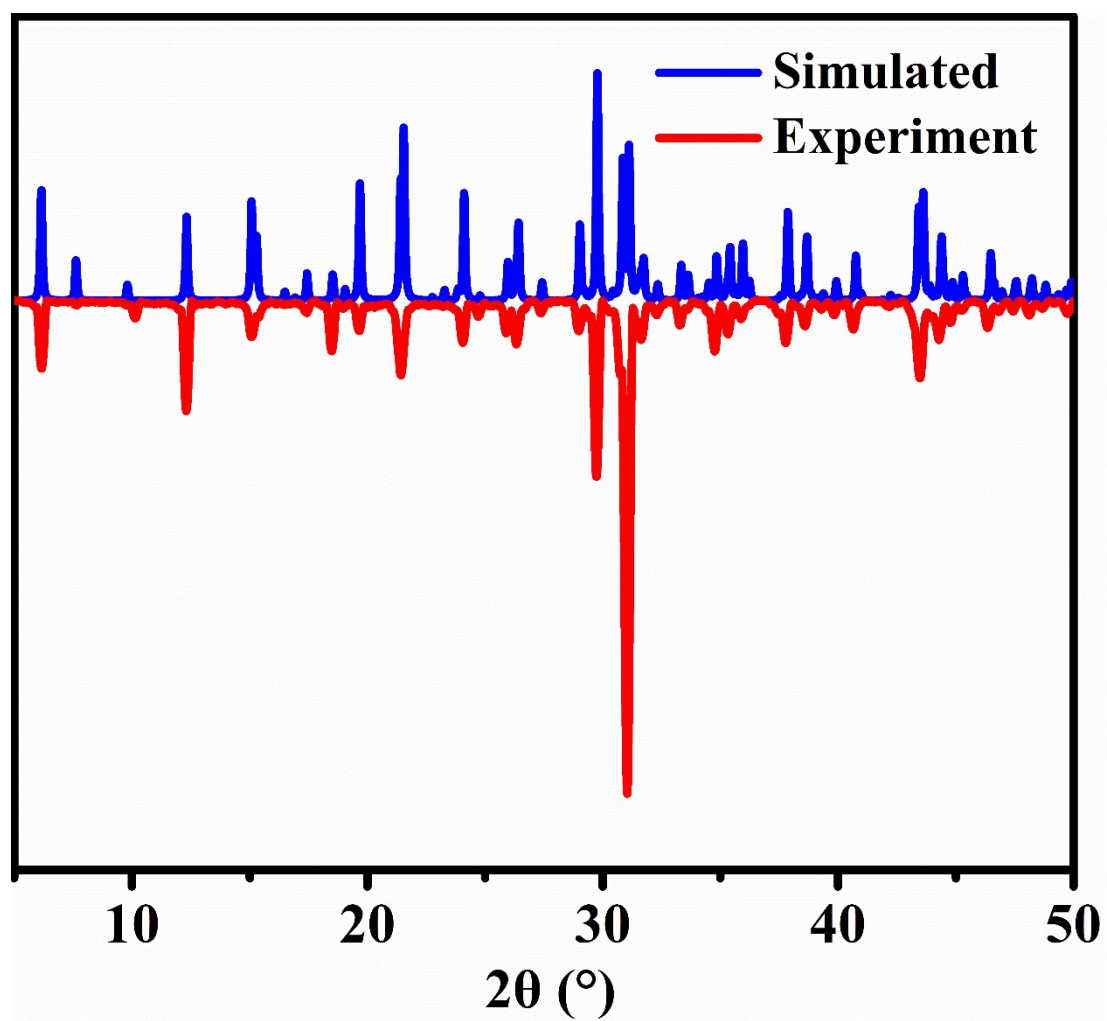

**Figure S2.** The simulated and experimental PXRD patterns of  $\text{Cs}_2[\text{C}(\text{NH}_2)_3]\text{Pb}_2\text{Br}_7$

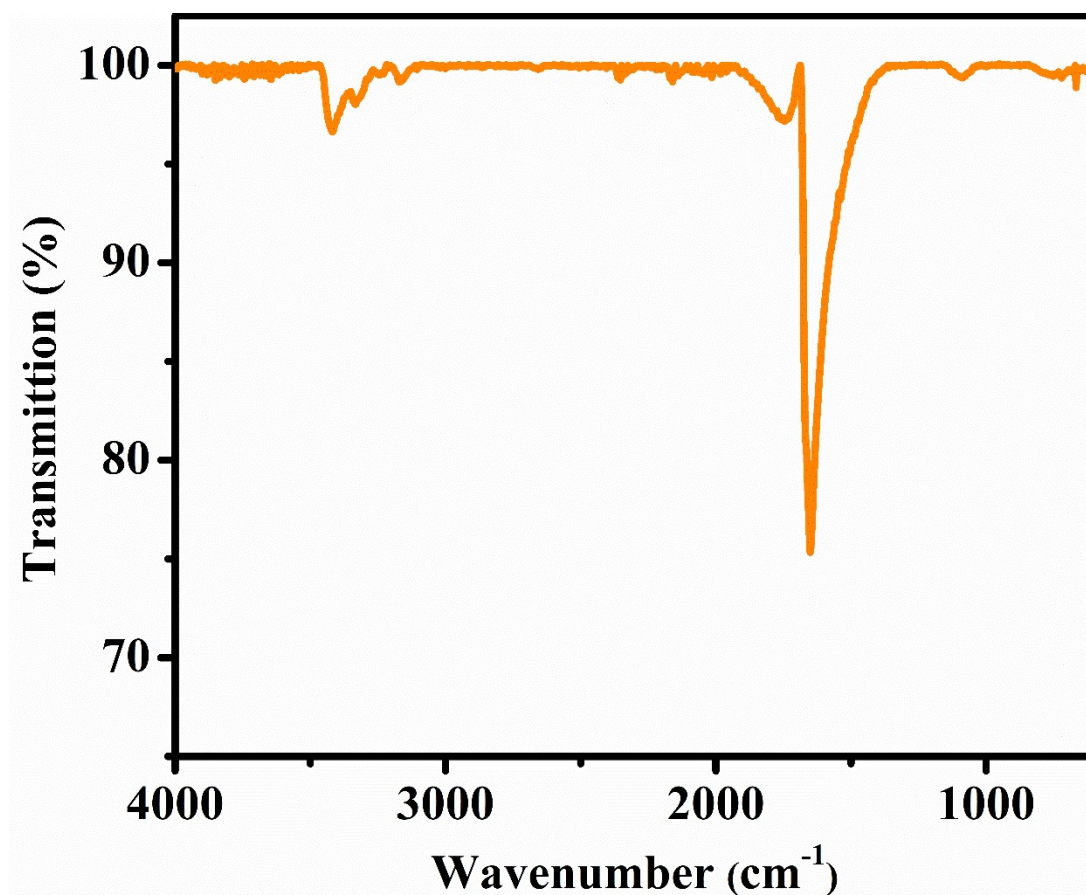

**Figure S3.** The IR spectrum of  $\text{Cs}_2[\text{C}(\text{NH}_2)_3]\text{Pb}_2\text{Br}_7$

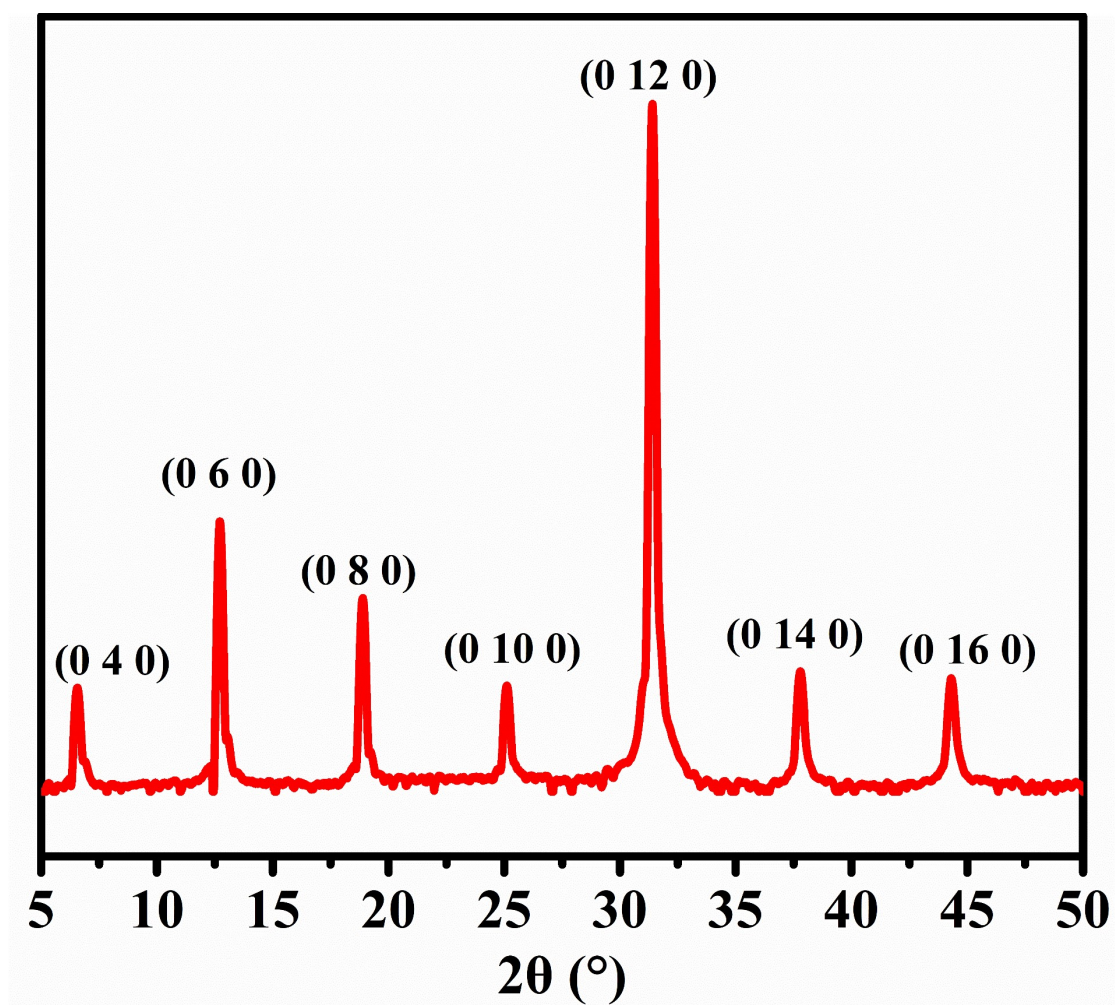

**Figure S4.** The PXRD patterns of single crystal  $\text{Cs}_2[\text{C}(\text{NH}_2)_3]\text{Pb}_2\text{Br}_7$

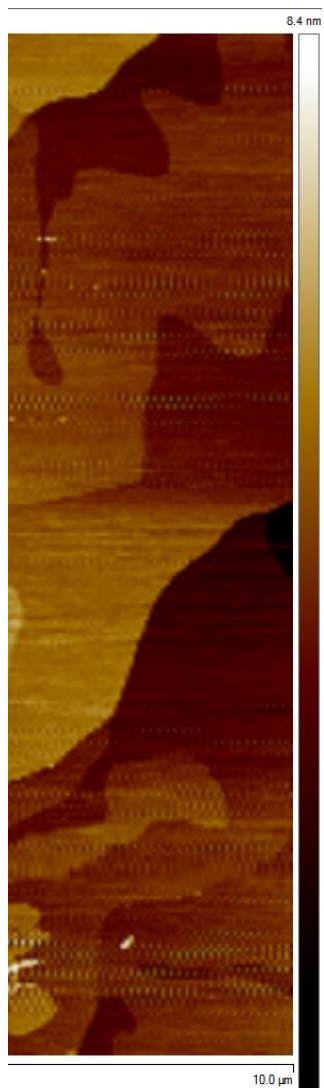

**Figure S5.** Atom force microscope test of single crystal  $\text{Cs}_2[\text{C}(\text{NH}_2)_3]\text{Pb}_2\text{Br}_7$

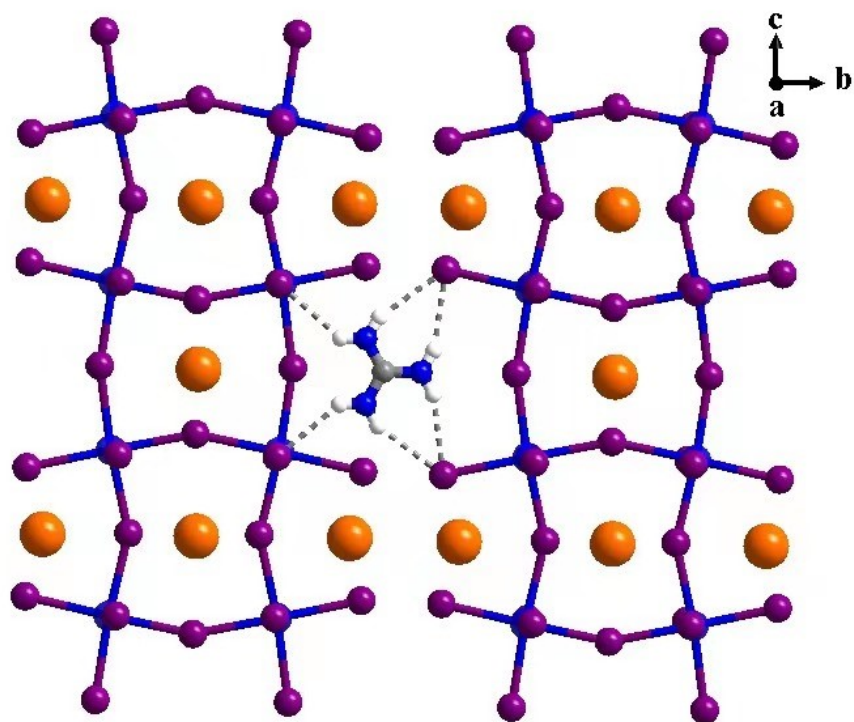

**Figure S6.** Hydrogen bonds in the compound  $\text{Cs}_2[\text{C}(\text{NH}_2)_3]\text{Pb}_2\text{Br}_7$

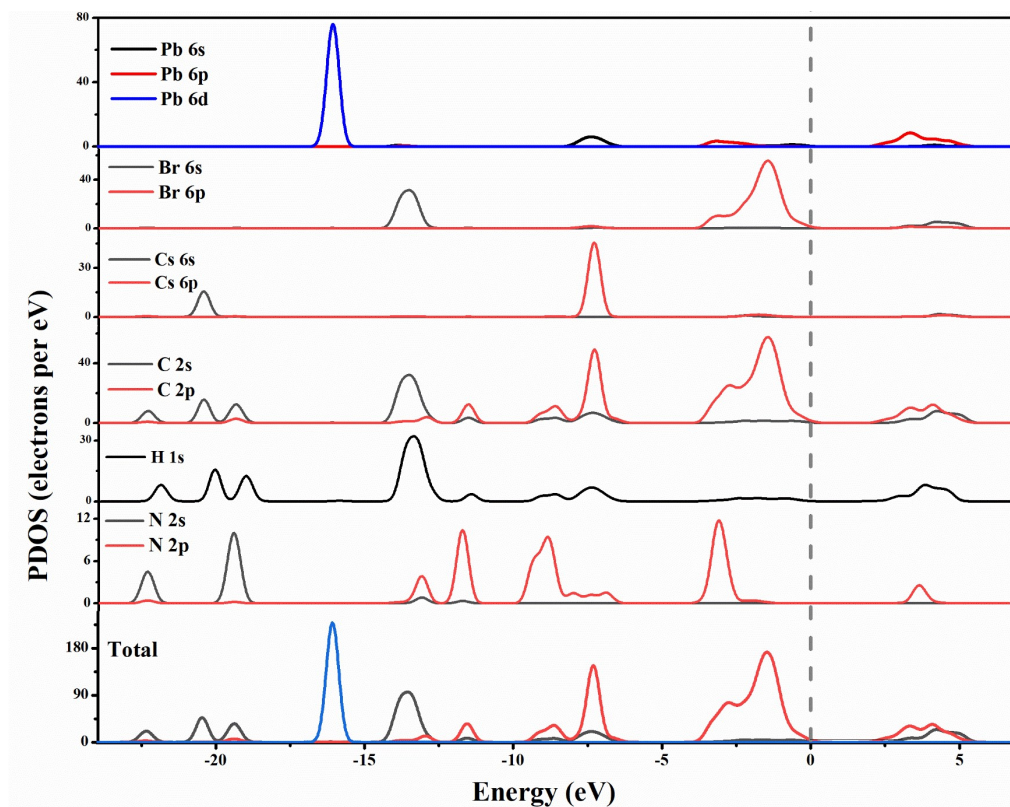

**Figure S7.** PDOS of the compound  $\text{Cs}_2[\text{C}(\text{NH}_2)_3]\text{Pb}_2\text{Br}_7$

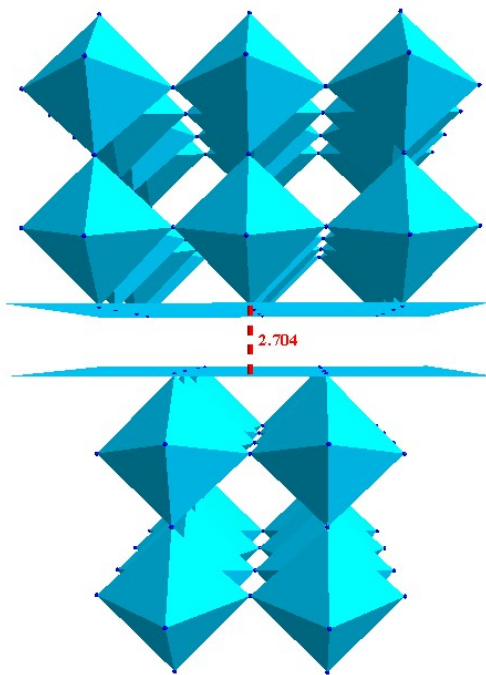

**Figure S8.** The distance between quantum wells

**Table S1.** Crystal Data and Structure Refinement for  $\text{Cs}_2[\text{C}(\text{NH}_2)_3]\text{Pb}_2\text{Br}_7$

|                                                |                                                                  |
|------------------------------------------------|------------------------------------------------------------------|
| Empirical formula                              | $\text{CH}_6\text{Br}_7\text{Cs}_2\text{N}_3\text{Pb}_2$         |
| Formula weight                                 | 1299.66                                                          |
| Temperature/K                                  | 200.00                                                           |
| Space group                                    | Cmmm                                                             |
| a/Å                                            | 5.99490(10)                                                      |
| b/Å                                            | 28.7131(9)                                                       |
| c/Å                                            | 11.5805(3)                                                       |
| $\alpha/^\circ$                                | 90                                                               |
| $\beta/^\circ$                                 | 90                                                               |
| $\gamma/^\circ$                                | 90                                                               |
| Volume/ Å <sup>3</sup>                         | 1993.38(9)                                                       |
| Z                                              | 4                                                                |
| $\rho_{\text{calc}}/\text{cm}^3$               | 4.331                                                            |
| $\mu/\text{mm}^{-1}$                           | 34.481                                                           |
| F(000)                                         | 2208.0                                                           |
| Radiation                                      | MoK $\alpha$ ( $\lambda = 0.71073$ )                             |
| 2 $\theta$ range for data collection/ $^\circ$ | 4.518 to 55.052                                                  |
| Index ranges                                   | $-7 \leq h \leq 7$ , $-37 \leq k \leq 32$ , $-15 \leq l \leq 14$ |
| Reflections collected                          | 7319                                                             |

|                                             |                                       |
|---------------------------------------------|---------------------------------------|
| Independent reflections                     | 1332 [Rint = 0.0404, Rsigma = 0.0300] |
| Data/restraints/parameters                  | 1332/0/55                             |
| Goodness-of-fit on F <sup>2</sup>           | 1.259                                 |
| Final R indexes [I>=2σ (I)]                 | R1 = 0.0460, wR2 = 0.1167             |
| Largest diff. peak/hole / e Å <sup>-3</sup> | 2.05/-5.45                            |

**Table S2.** The Pb - Br bond lengths of Cs<sub>2</sub>[C(NH<sub>2</sub>)<sub>3</sub>]Pb<sub>2</sub>Br<sub>7</sub>

| Bond          | (Å)        | Bond                       | (Å)         |
|---------------|------------|----------------------------|-------------|
| Pb(1) - Br(5) | 2.9759(15) | Pb(1) - Br(8) <sup>1</sup> | 3.00339(15) |
| Pb(1) - Br(6) | 2.9477(7)  | Pb(1) - Br(8)              | 3.00339(15) |
| Pb(1) - Br(7) | 2.9795(7)  | Pb(1) - Br(9)              | 2.9465(6)   |

**Table S3.** The bond angles of Cs<sub>2</sub>[C(NH<sub>2</sub>)<sub>3</sub>]Pb<sub>2</sub>Br<sub>7</sub>

| Bond                               | Angle/°   | Bond                               | Angle/°    |
|------------------------------------|-----------|------------------------------------|------------|
| Br(5) - Pb(1) – Br(7)              | 178.91(6) | Br(9) - Pb(1) – Br(7)              | 175.53(8)  |
| Br(5) - Pb(1) – Br(8) <sup>1</sup> | 92.80(4)  | Br(9) - Pb(1) – Br(7)              | 86.92(8)   |
| Br(5) - Pb(1) – Br(8)              | 92.80(4)  | Br(9) - Pb(1) – Br(7)              | 92.05(4)   |
| Br(6) - Pb(1) – Br(5)              | 90.30(6)  | Br(9) - Pb(1) – Br(7)              | 92.05(4)   |
| Br(6) - Pb(1) – Br(7)              | 88.61(7)  | Pb(1) - Br(1) – Pb(7)              | 154.43(11) |
| Br(6) - Pb(1) – Br(8)              | 87.72(4)  | Pb(1) - Br(1) – Pb(7)              | 157.23(11) |
| Br(6) - Pb(1) – Br(8) <sup>1</sup> | 87.72(4)  | Pb(1) - Br(1) – Pb(7)              | 172.79(8)  |
| Br(7) - Pb(1) – Br(8) <sup>1</sup> | 87.15(4)  | Pb(1) <sup>5</sup> - Br(1) – Pb(7) | 163.38(13) |
| Br(7) - Pb(1) – Br(8)              | 87.15(4)  | N(2) – C00C – N(7)                 | 118.8(11)  |
| Br(8) <sup>1</sup> - Pb(1) – Br(8) | 172.79(8) | N(2) <sup>5</sup> – C00C – N(7)    | 118.8(11)  |
| Br(9) - Pb(1) – Br(5)              | 94.17(7)  | N(2) <sup>5</sup> – C00C – N(7)    | 122(2)     |

<sup>1</sup>1+X,+Y,+Z; <sup>2</sup>+X,+Y,1-Z; <sup>3</sup>2-X,1-Y,+Z; <sup>4</sup>-1+X,+Y,+Z; <sup>5</sup>+X,+Y,-Z

## Experiment

**Synthesis and Crystal Growth:** To obtain the single crystal of 1, cesium bromide (CsBr, 5mmol), guanidinium carbonate (G2CO<sub>3</sub>, 15mmol) and lead(II) bromide (PbBr<sub>2</sub>, 10mmol) were dissolved in 50mL of aqueous HBr (48% by mass), strong gas evolution was observed, and a yellow precipitate formed. Large-size crystals were grown through temperature cooling method..

-

**Powder X-Ray Diffraction Analysis:** Powder X-Ray Diffractometer (PXRD) patterns were conducted with the MiniFlex II X-ray diffractometer to examine the phase purity of 1. The experimental PXRD patterns were recorded in the 2theta (2θ) range of 5°–50° with a step size of 5°. The experimental PXRD patterns was obtained at room

temperature matching fairly well with the calculated data based on the single-crystal structure, which solidly confirmed the purity of the crystals of 1 (Figure S2).

**Crystal Structure Determination:** Single-crystal X-ray diffraction was conducted via Bruker D8 Quesr/Venture diffractometer with Mo K $\alpha$  radiation ( $\lambda = 0.77 \text{ \AA}$ ). Crystal structure of Cs<sub>2</sub>[C(NH<sub>2</sub>)<sub>3</sub>]Pb<sub>2</sub>Br<sub>7</sub> was solved through direct method and was refined via the full-matrix least squares refinements on F<sup>2</sup> using SHELXLTL software package. Crystal data and structure information are published in Tables S1–S3, Supporting Information.

**Ultraviolet-visible (UV–vis) Absorption Spectrum:** UV–vis diffuse reflectance spectroscopies of desired materials were performed at room temperature on Perkin-Elmer Lambda 950 UV–vis–IR spectrophotometer in a variable wavelength range between 300 to 700 nm. The BaSO<sub>4</sub> was used as the 100 % reflectance reference, and the powdered crystals were used for the measurements. Near the cut-off of the optical transmission, the band gap, the absorption and the wave frequency obey the equation:

$$\alpha h\nu = A(h\nu - E_g) n/2$$

Where  $\alpha$ ,  $\nu$ ,  $A$ , and  $E_g$  are absorption coefficient, light frequency, proportionality constant, and band gap, respectively.

[CCDC 2115841 contains the supplementary crystallographic data for this paper. These data can be obtained free of charge from The Cambridge Crystallographic Data Centre via [www.ccdc.cam.ac.uk/data\\_request/cif](http://www.ccdc.cam.ac.uk/data_request/cif).]
